# Supplementary material
Source: Frontiers journal article supplement (https://www.frontiersin.org/articles/419905)
Supplement: Data_Sheet_1.PDF [file Data_Sheet_1.PDF]

SUPPLEMENTARY TABLES For Comparable results for subjects imaged on Scanner 2 only (MDD: 70, Healthy Controls 37).

Supplementary Table 1: Main effect of group without subjects from Scanner I (Indiana University). The results shown below were examined at voxel-wise  $p < 0.01$  (uncorrected). For cluster-wise significance threshold for  $p < 0.05$  (corrected) a cluster size of 1128 voxels is needed.

| ROI | Target area                                                                                                | cluster size | peak Z | peak p(uncorrected) | x,y,z (MNI) |
|-----|------------------------------------------------------------------------------------------------------------|--------------|--------|---------------------|-------------|
| DRN | Right Pre-Frontal Cortex extending into Right Frontal Superior Area and Left Frontal Middle Orbital Cortex | 728          | 3.6    | 0.0001              | 36 64 -6    |
| DRN | Left Pre-Frontal Cortex extending into Left Insula                                                         | 396          | 3.69   | 0.0001              | -38 20 12   |
| DRN | Right Supplementary Motor Area                                                                             | 304          | 4.01   | 0.0001              | 14 2 66     |
| DRN | Left Ventral Anterior Cingulate Cortex extending into Caudate                                              | 781          | 3.52   | 0.0001              | -2 10 -8    |

Supplementary Table 2: Correlation between DRN connectivity and HAM-D scores without subjects from Scanner I (Indiana University). The results shown below were examined at voxel-wise  $p < 0.01$  (uncorrected). For cluster-wise significance threshold for  $p < 0.05$  (corrected) a cluster size of 1216 voxels is needed. \* significant

| ROI | Target area                                                                          | Correlation    | cluster size | peak Z | peak p(uncorrected) | x,y,z (MNI) |
|-----|--------------------------------------------------------------------------------------|----------------|--------------|--------|---------------------|-------------|
| DRN | Left Inferior Triangular Area extending into Left Amygdala, Hippocampus, Left Insula | HAM-D positive | 1165         | 3.71   | 0.0001              | -48 24 6    |
| DRN | Right Temporal middle pole extending into Right Amygdala and Right Insula            | HAM-D positive | 1441*        | 3.39   | 0.0001              | 50 20 -28   |

Supplementary Table 3: Correlation between VTA connectivity and antidepressant treatment associated percent change in 17-item-HAM-D scores without subjects from Scanner I (Indiana University). The results shown below were examined at voxel-wise  $p < 0.01$  (uncorrected). For cluster-wise significance threshold for  $p < 0.05$  (corrected) at  $p$  a cluster size of 1107 voxels is needed. . \* significant

| ROI | Target area                       | Correlation                     | cluster size | peak Z | peak p(uncorrected) | x,y,z (MNI) |
|-----|-----------------------------------|---------------------------------|--------------|--------|---------------------|-------------|
| VTA | Left Cuneus, Occipital, Calcarine | HAM-D positive-Treatment effect | 1351*        | 4.03   | 0.0001              | -20 -78 10  |
